# Supplementary material
Source: PubMed Central journal article supplement (PMC7247952)
Supplement: NIHMS1569455-supplement-1.pdf [file NIHMS1569455-supplement-1.pdf]

**Table S1.** Primers used for PCR

| <b>Gene</b>     | <b>Forward Primer</b>    | <b>Reverse Primer</b>  |
|-----------------|--------------------------|------------------------|
| <i>HS KLK5</i>  | CACAAGGGTAATCTCCCCAG     | AGATGACACCATGTTCTGCG   |
| <i>HS KLK7</i>  | GGGTACCTCTGCACACCAAC     | GGATGTCAAGCTCATCTCCC   |
| <i>HS ACTB</i>  | ACCTTCTACAATGAGCTGCG     | CCTGGATAGCAACGTACATGG  |
| <i>MM Klk5</i>  | GAACCACTTAGCCTCGACCTTTAT | GTTTCGGTTCCAGAGGGGTTG  |
| <i>MM Klk7</i>  | GTGCTGGCATTCTGACTCTA     | CCATCACCCACCGTTTGTACT  |
| <i>MM Gapdh</i> | CCCAGCAAGGACACTGAGCAA    | TTATGGGGGTCTGGGATGGAAA |
| <i>MM Il4ra</i> | GTTACAGGAACAAGACCAGCA    | TGGAGCCTGAACTCGCA      |
| <i>MM Il4</i>   | GAACGAGGTCACAGGAGAAG     | ACCTTGGAAGCCCTACAGA    |
| <i>MM Il13</i>  | TGCCATCTACAGGACCCAGA     | CTCATTAGAAGGGGCCGTGG   |

**Table S2.** Primary antibodies for flow cytometry

| <b>Antibody</b>   | <b>Vendor</b> | <b>Catalog #</b> | <b>Antibody</b>  | <b>Vendor</b> | <b>Catalog #</b> |
|-------------------|---------------|------------------|------------------|---------------|------------------|
| CD49b APC         | Biolegend     | 17-5971-82       | Siglec-F BV421   | BD            | 562681           |
| CD11b BV510       | Biolegend     | 101245           | CD117 BV605      | Biolegend     | 135122           |
| CD3ε PerCP/Cy5.5  | eBioscience   | 45-0031-82       | CD5 PerCP/Cy5.5  | eBioscience   | 45-0051-82       |
| CD11c PerCP/Cy5.5 | eBioscience   | 45-0114-82       | CD19 PerCP/Cy5.5 | eBioscience   | 45-0193-82       |
| NK1.1 PerCP/Cy5.5 | eBioscience   | 45-5941-82       | ST2-Biotin       | Biolegend     | 145307           |
| KLRG1 PE/Dazzle   | Biolegend     | 138424           | CD25 BV605       | Biolegend     | 102035           |
| FcεRIα FITC       | eBioscience   | 11-5898-85       | IgE FITC         | eBioscience   | 11-5992-81       |
| CD90.2 PE/Cy7     | Biolegend     | 140309           | CD45 APC         | Biolegend     | 103111           |
| CD45.2 PE         | Biolegend     | 109808           | CD3ε PE          | Biolegend     | 100307           |

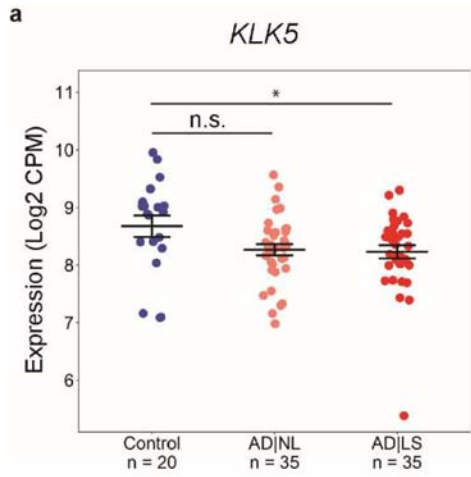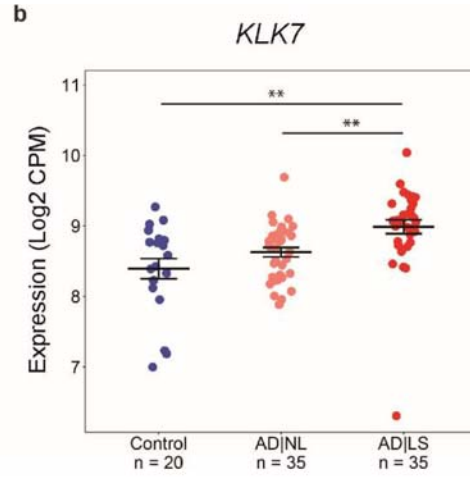

**c** Pearson correlation

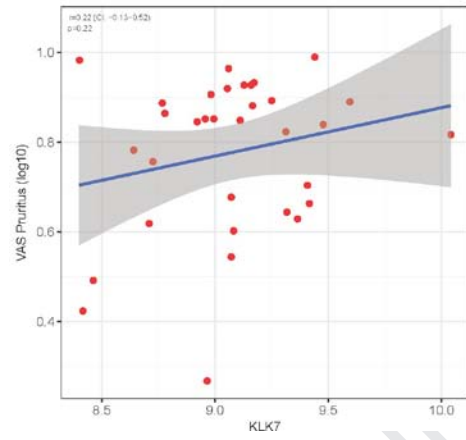

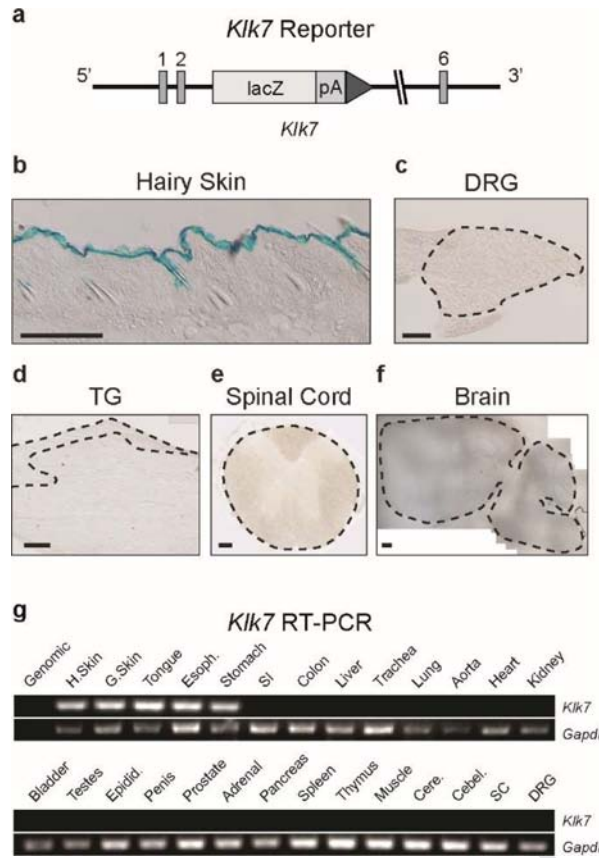

Journal Pre-proof

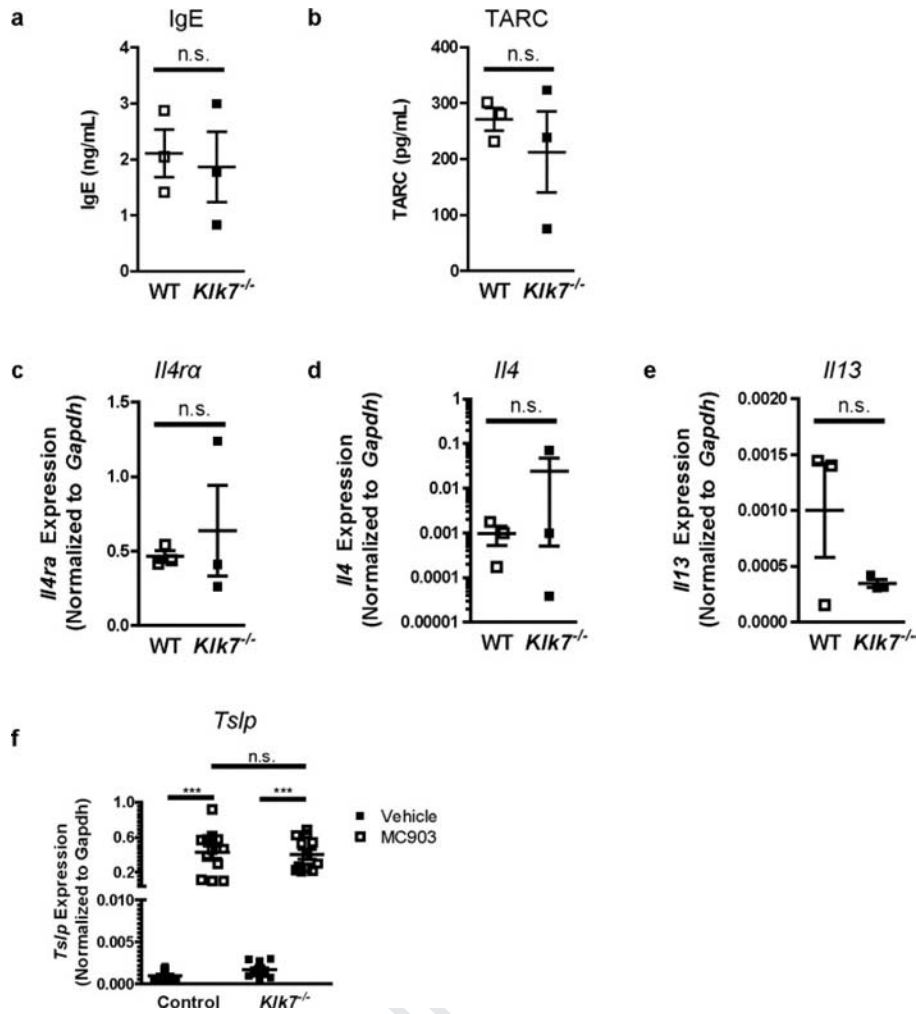

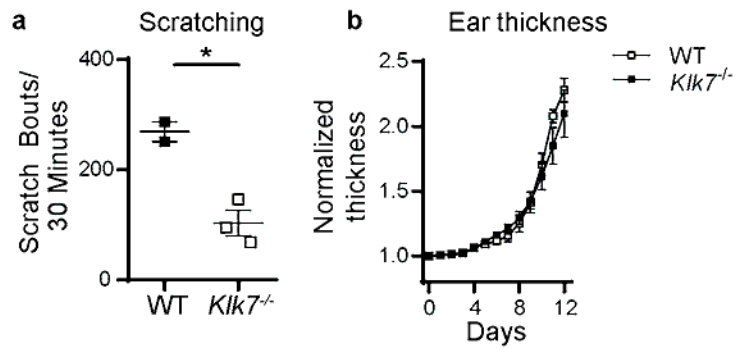

Journal Pre-proof

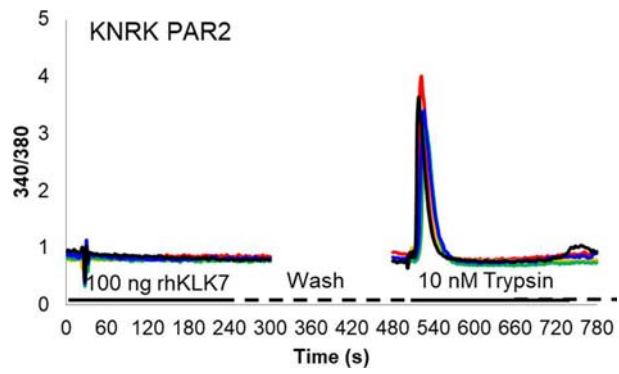

Journal Pre-proof

a.

b.

c.

**Behavior**

**Cultured DRGs**

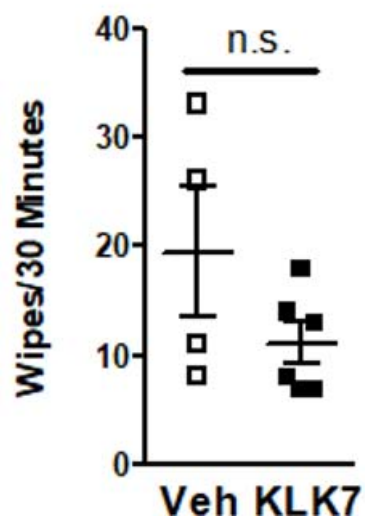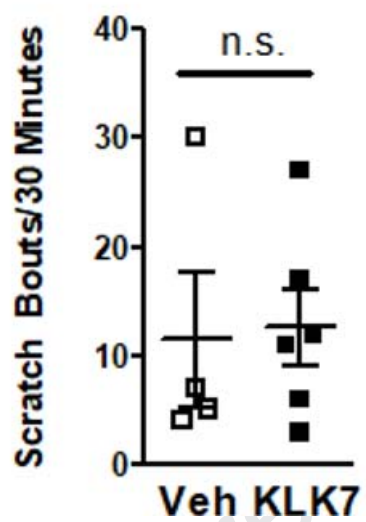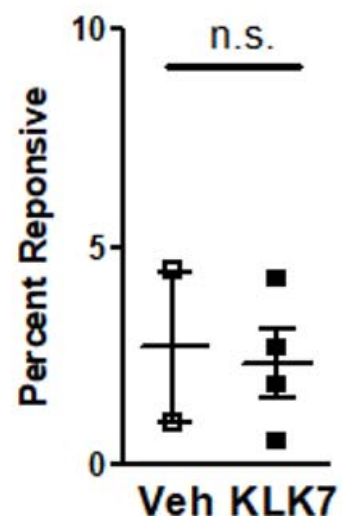

Journal Pre



## SUPPLEMENTAL TEXT

**Figure S1.** *KLK7*, but not *KLK5*, is upregulated in human lesional AD skin. **a.** Log<sub>2</sub> read counts per million (CPM) of *KLK5* in control skin from donors without AD (N=20, age = 36.8 ± 2.4 years, 42.9% female), and matched pairs of non-lesional (NL) skin and lesional (LS) skin from donors with AD (N=35, age = 34.3 ± 2.5 years, 50% female). **b.** Log<sub>2</sub> CPM of *KLK7* in the same RNA-seq data set. Note that *KLK7* is overexpressed only in lesional AD skin. n.s. no significance. \*  $p < 0.05$ . \*\*  $p < 0.01$ . **c.** Pearson correlation between *KLK7* transcript abundance in lesional skin and the Visual Analog Scale (VAS) itch scores from AD patients.  $R = 0.22$  (CI -0.13 – 0.52),  $p = 0.22$ .

**Figure S2.** *Klk7* expression is restricted to the epidermis in mouse skin. **a.** Genomic construct of the *Klk7*<sup>tm1(KOMP)Vlcg</sup> allele. Exons 3-5 within the coding region of *Klk7* is replaced with a *LacZ-β-galactosidase* reporter. **b.** X-gal staining (blue) of hair-bearing skin from a *Klk7*<sup>LacZ</sup> mouse, in which LacZ expression is controlled under the *Klk7* promoter. **c-f.** X-gal staining of **c.** dorsal root ganglia (DRG), **d.** trigeminal ganglia (TG), **e.** spinal cord, **f.** and brain. **g.** RT-PCR screening of *Klk7* expression in tissues from a WT control mouse. n = 3 biological replicates for panels **b-g**.  
H. Skin = hairy skin. G. Skin = glabrous skin. SI = Small intestine.

**Figure S3.** *Klk7*<sup>-/-</sup> mice do not show lowered Th2 and inflammatory markers after MC903 Treatment. **a-b.**

ELISA based quantification of serum **a.** IgE and **b.** TARC levels in MC903 treated control and *Klk7*<sup>-/-</sup>

mice. **c-e.** RT-qPCR quantification of **c.** *Il4ra*, **d.** *Il4*, and **e.** *Il13* expression in MC903 treated skin of

control and *Klk7*<sup>-/-</sup> mice. **f.** RT-qPCR quantification of *Tslp* expression in vehicle or MC903 treated skin

of control and *Klk7*<sup>-/-</sup> mice. n.s. no significance. \*\*\*  $p < 0.001$

**Figure S4.** rhKLK7 does not activate PAR2 receptors. Representative calcium transients of KRNK cells

stably transduced with PAR2 expression after treatment with rhKLK7 and Trypsin.

**Figure S5.** Acute *in vivo* and *in vitro* effects of rhKLK7. a.-b. Acute pain (wiping) and itch (scratching)

behavioral responses of C57BL/6J mice to v n.s. or 1  $\mu$ g rhKLK7 injections. c. Quantification of

calcium responses of culture DRG neurons from *Pirt*<sup>GCaMP/+</sup> mice to acute application of vehicle or 20

ng/ $\mu$ l rhKLK7. Percent responsive represents fraction of all DRG neurons in field. Data is presented as

mean  $\pm$  SEM. Statistical significance was determined using two tailed Student's *t* test. n.s. denotes no

significance.
